# Supplementary material for: Characterization of a Novel M4 PAM PET Radioligand [11C]PF06885190 in Nonhuman Primates (NHP)
Source: MDPI journal article supplement (doi:10.3390/molecules28124612), 2023-06-07
Supplement: s1 [file s1]

Figure S1A

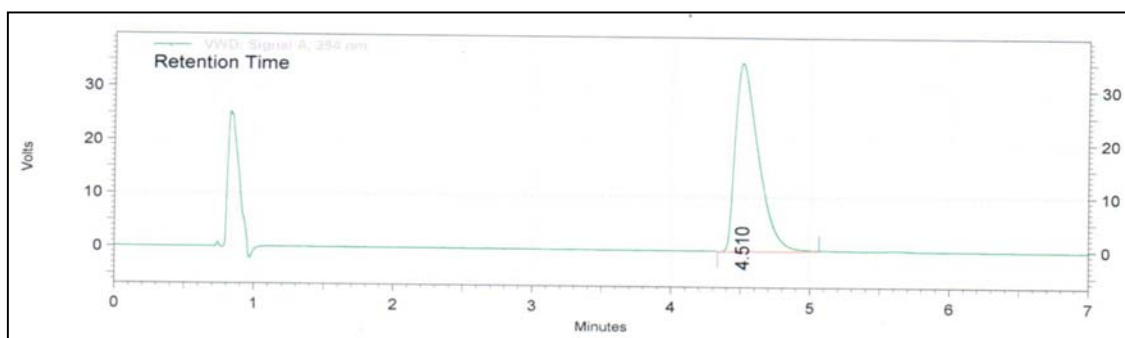

Figure S1B

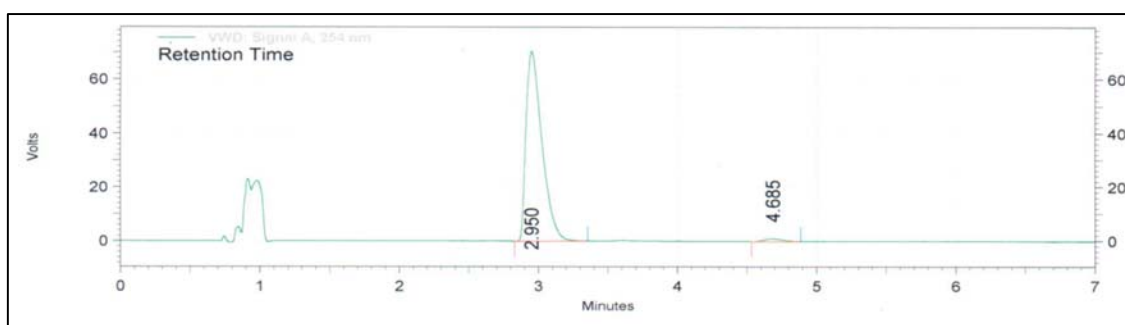

**Figure S1.** A. An HPLC chromatogram of the analysis of reference standard PF06885190 B. An HPLC chromatogram of the analysis of the precursor PF-07069691.

Figure S2

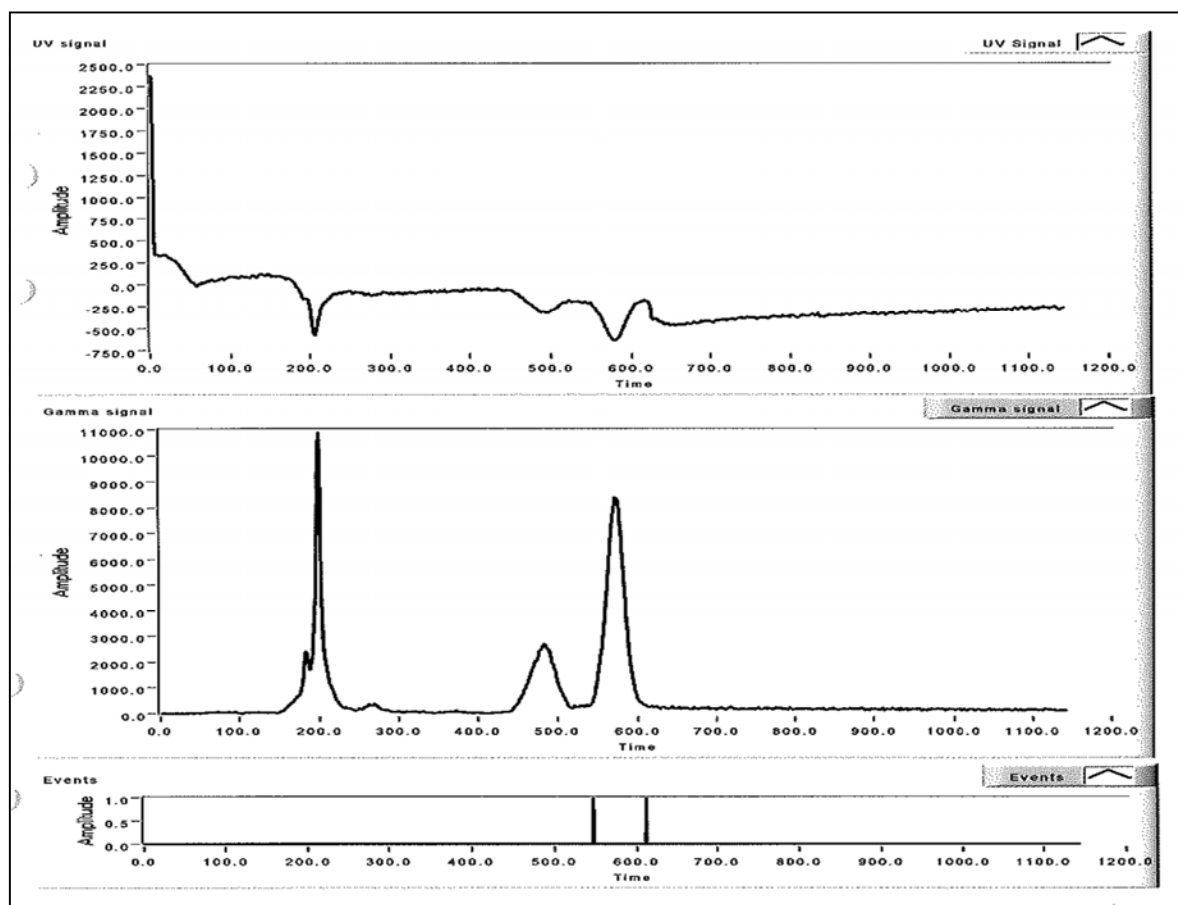

**Figure S2.** An HPLC chromatogram (upper: UV and bottom: radio chromatogram) of the semi-preparative purification of [ $^{11}\text{C}$ ]PF-06885190

Figure S3

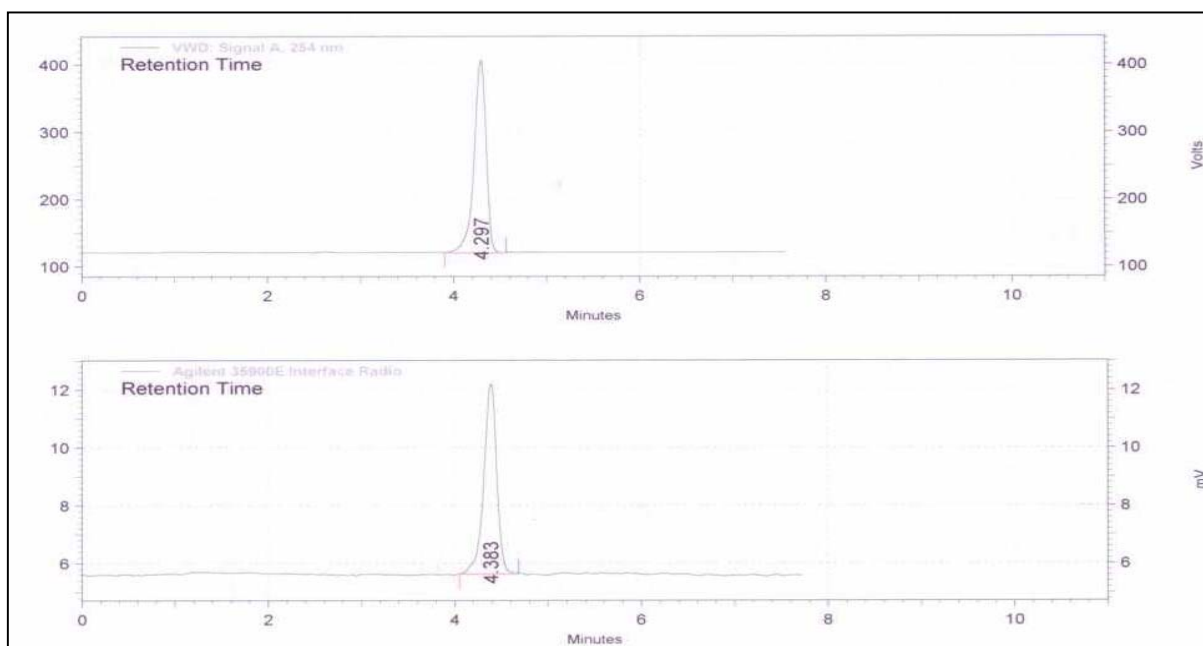

**Figure S3.** An HPLC chromatogram of the analysis of [ $^{11}\text{C}$ ]PF06885190 co injected with the cold reference standard PF-06885190. Upper represents the radio-chromatogram of [ $^{11}\text{C}$ ]PF-06885190 and the bottom represents the UV -chromatogram of PF-06885190.

Figure S4

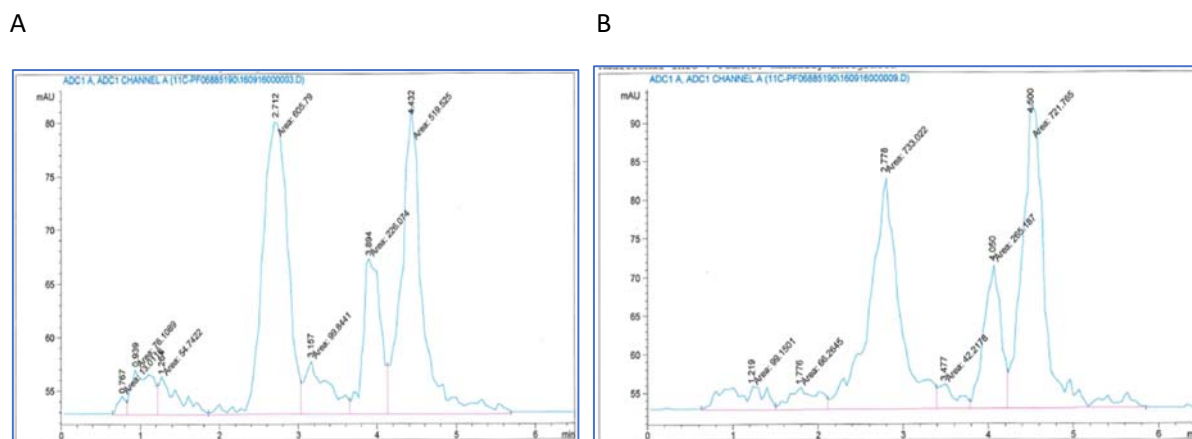

**Figure S4.** Radiometabolite analysis during the course of the PET measurements. It is shown as the relative plasma composition of radiometabolites and parent compound in % of total plasma radioactivity that was injected. **A.** A representative HPLC chromatogram 15 min after injection of [ $^{11}\text{C}$ ]PF-06885190 at baseline condition and **B.** A representative HPLC chromatogram 15 min after injection of [ $^{11}\text{C}$ ]PF-06885190 after pretreatment with CVL-231.
